# Supplementary material for: The Genetic Architecture of Natural Variation in Recombination Rate in Drosophila melanogaster
Source: PLoS Genet. 2016 Apr 1;12(4):e1005951. doi: 10.1371/journal.pgen.1005951 (PMC4817973; doi:10.1371/journal.pgen.1005951)
Supplement: S17 Table — List of DGRP lines selected for each candidate gene for qPCR expression analysis. (XLSX) [file pgen.1005951.s025.xlsx]

## Sheet: S17 Table
Gene	Major Allele (#1)	Major Allele (#2)	Major Allele (#3)	Minor Allele (#1)	Minor Allele (#2)	Minor Allele (#3)
alph	DGRP_49	DGRP_310	DGRP_332	DGRP_379	DGRP_843	DGRP_879
bru-2	DGRP_59	DGRP_367	DGRP_761	DGRP_307	DGRP_491	DGRP_730
cdi	DGRP_757	DGRP_765	DGRP_774	DGRP_589	DGRP_703	DGRP_911
CG1273	DGRP_365	DGRP_370	DGRP_391	DGRP_287	DGRP_441	DGRP_716
CG4440	DGRP_315	DGRP_320	DGRP_321	DGRP_223	DGRP_530	DGRP_783
CG7196	DGRP_73	DGRP_75	DGRP_531	DGRP_57	DGRP_439	DGRP_737
CG9650	DGRP_356	DGRP_535	DGRP_787	DGRP_375	DGRP_395	DGRP_639
CG10864	DGRP_354	DGRP_355	DGRP_362	DGRP_91	DGRP_176	DGRP_505
CG15365	DGRP_392	DGRP_399	DGRP_596	DGRP_239	DGRP_804	DGRP_832
CG33970	DGRP_508	DGRP_513	DGRP_517	DGRP_304	DGRP_705	DGRP_850
dpr6	DGRP_21	DGRP_228	DGRP_235	DGRP_41	DGRP_229	DGRP_890
Eip75B	DGRP_83	DGRP_790	DGRP_796	DGRP_233	DGRP_386	DGRP_486
grp	DGRP_26	DGRP_101	DGRP_301	DGRP_161	DGRP_319	DGRP_406
jing	DGRP_158	DGRP_256	DGRP_900	DGRP_42	DGRP_227	DGRP_727
lola	DGRP_129	DGRP_142	DGRP_149	DGRP_40	DGRP_822	DGRP_892
MESR3	DGRP_45	DGRP_340	DGRP_371	DGRP_153	DGRP_208	DGRP_280
Oaz	DGRP_177	DGRP_181	DGRP_195	DGRP_306	DGRP_380	DGRP_801
pk	DGRP_217	DGRP_427	DGRP_887	DGRP_382	DGRP_808	DGRP_819
Ptp61F	DGRP_853	DGRP_859	DGRP_897	DGRP_357	DGRP_461	DGRP_799
Ubx	DGRP_805	DGRP_818	DGRP_882	DGRP_318	DGRP_385	DGRP_509
