# Supplementary material for: The Genetic Architecture of Natural Variation in Recombination Rate in Drosophila melanogaster
Source: PLoS Genet. 2016 Apr 1;12(4):e1005951. doi: 10.1371/journal.pgen.1005951 (PMC4817973; doi:10.1371/journal.pgen.1005951)
Supplement: S21 Table — Lines used for functional assessment. (XLSX) [file pgen.1005951.s029.xlsx]

## Sheet: S21 Table
Candidate Gene	Genotype	Stock Center & Stock #	P-element Locations
alph	Df(3R)ED6316	BDSC 8925	N/A
alph	w1118; PBac{w[+mC]=PB}alph[c04528]	BDSC 11492	5' UTR
alph	P{KK107730}VIE-260B	VDRC 105483	N/A
bru-2	w1118; PBac{w[+mC]=WH}bru-2[f00171]	BDSC 18300	N/A
bru-2	P{KK108932}VIE-260B	VDRC 109739	N/A
cdi	w1118; Df(3R)ED5911, P{w[+mW.Scer\FRT.hs3]=3'.RS5+3.3'}ED5911/TM6C, cu1 Sb1	BDSC 8683	N/A
cdi	w1118; Mi{ET1}cdi[MB02390]	BDSC 24441	5' UTR
cdi	w1118; P{GD8731}v43634	VDRC 43634	N/A
cdi, CG10864	Df(3R)ED2	BDSC 6962	N/A
CG4440	P{KK111759}VIE-260B	VDRC 102475	N/A
CG7196	Df(2L)ED508	BDSC 8944	N/A
CG7196	w1118; P{GD12166}v22526	VDRC 22526	N/A
CG9650	PBac{RB}CG9650[e04580]	Exelixis e04580	Intron
CG9650	P{KK108364}VIE-260B	VDRC 104402	N/A
CG10864	P{KK104447}VIE-260B	VDRC 107858	N/A
CG15365	P{KK100288}VIE-260B	VDRC 103369	N/A
CG33970	P{KK109988}VIE-260B	VDRC 101855	N/A
CG33970	Df(3R)ED6232	BDSC 8105	N/A
dpr6	w1118; Mi{ET1}dpr6[MB04096]	BDSC 24673	Intron
dpr6	P{KK112634}VIE-260B	VDRC 103521	N/A
Eip75B	Df(3L)ED4710	BDSC 8100	N/A
Eip75B	y1 sc* v1; P{y[+t7.7] v[+t1.8]=TRiP.GLC01418}attP2	BDSC 43231	N/A
grp	PBac{WH}grp[f03358]	Exelixis f03358	Intron
grp	w1118; Mi{ET1}grp[MB08323]	BDSC 26107	Intron
grp	P{KK108548}VIE-260B	VDRC 110076	N/A
grp	Df(2L)ED1109	BDSC 8945	N/A
jing	Df(2R)ED1552	BDSC 8044	N/A
jing	y1 w*; Mi{y[+mDint2]=MIC}jing[MI03555]/SM6a	BDSC 36997	Intron
lola	PBac{PB}lola[c01925]	Exelixis c01925	Intron
lola	y1 w*; Mi{y[+mDint2]=MIC}lola[MI04800]	BDSC 38056	Intron
lola	y1 w*; Mi{y[+mDint2]=MIC}lola[MI06282]/SM6a	BDSC 40802	Exon (lola-RV)
MESR3	w1118; Mi{ET1}MESR3[MB06218]	BDSC 25484	Intron
MESR3	y1 v1; P{y[+t7.7] v[+t1.8]=TRiP.GLC01393}attP2	BDSC 50509	N/A
Oaz	P{XP}Oaz[d09084]	Exelixis d09084	Intron
Oaz	y1 sc* v1; P{y[+t7.7] v[+t1.8]=TRiP.GLV21080}attP2	BDSC 35715	N/A
pk	w1118; Mi{ET1}pk[MB11776] CG30384[MB11776]	BDSC 29252	Intron
pk	P{KK109294}VIE-260B	VDRC 101480	N/A
pk	Df(2R)ED1673	BDSC 9062	N/A
Ptp61F	Df(3L)ED207	BDSC 8053	N/A
Ptp61F	w1118; Mi{ET1}Ptp61F[MB08823] CG32320[MB08823]	BDSC 26133	Intron
Ptp61F	P{KK101883}VIE-260B	VDRC 108888	N/A
Ubx	PBac{WH}Ubx[f07161]	Exelixis f07161	5' UTR
Ubx	w1118; P{GD5049}v37825	VDRC 37825	N/A
Control Line	w1118	BDSC 5905
Control Line	w1118	BDSC 6326
Control Line	y1 w1118	BDSC 6598
Control Line	y1 v1; P{y[+t7.7]=CaryP}attP2	BDSC 36303
Control Line	w1118 (For GD)	VDRC 60000
Control Line	y, w1118;P{attP,y[+],w[3`]} (For KK)	VDRC 60100
