# Supplementary material for: The Genetic Architecture of Natural Variation in Recombination Rate in Drosophila melanogaster
Source: PLoS Genet. 2016 Apr 1;12(4):e1005951. doi: 10.1371/journal.pgen.1005951 (PMC4817973; doi:10.1371/journal.pgen.1005951)
Supplement: S23 Table — Spearman’s rank correlation for crossover rates in the e ro and y v intervals (using only standard karyotypes) compared to other DGRP published phenotypes. Sources of data are listed both within the main text as well as in the chart. Significant correlations are in bold. (XLSX) [file pgen.1005951.s031.xlsx]

## Sheet: S23 Table
Trait	e ro ρ	e ro P-value	y v ρ	y v P-value	Data Source
1-Hexanol_F	0.0972	0.3194	0.1409	0.1498	Arya et al. 2015
1-Hexanol_M	0.1201	0.218	0.1487	0.1281	Arya et al. 2015
2-Heptanone_F	0.1701	0.0799	0.1913	0.0495	Arya et al. 2015
2_Heptanone_M	0.1701	0.0799	0.1575	0.1068	Arya et al. 2015
2-Phenyl_Ethyl_Alcohol_F	0.077	0.4305	0.0596	0.5441	Arya et al. 2015
2-Phenyl_Ethy_lAlcohol_M	0.0903	0.3547	0.038	0.6991	Arya et al. 2015
Acetophenone_F	0.0844	0.3873	0.1509	0.1227	Arya et al. 2015
Acetophenone_M	0.0803	0.4109	0.0152	0.877	Arya et al. 2015
Aggression_M	0.0972	0.31	0.0804	0.4035	Shorter et al. 2015
Benz_F	0.1225	0.237	0.1178	0.258	Swarup et al. 2013
Benz_M	0.1214	0.2412	0.0328	0.7539	Swarup et al. 2013
Benzaldehyde_F	0.057	0.5599	0.0579	0.5554	Arya et al. 2015
Benzaldehyde_M	0.0133	0.8919	0.1362	0.1639	Arya et al. 2015
Chill_Coma_Recovery_F	0.0247	0.8063	-0.0173	0.8645	Ayroles et al. 2009; Mackay et al. 2012
Chill_Coma_Recovery_M	-0.0153	0.879	0.0123	0.9032	Ayroles et al. 2009; Mackay et al. 2012
Citral_F	0.2046	0.0345	0.2081	0.0323	Arya et al. 2015
Citral_M	0.1202	0.2173	0.2778	0.0039	Arya et al. 2015
Day_Avg_Bout_Length_F	0.0181	0.8602	0.0621	0.5475	Harbison et al. 2013
Day_Avg_Bout_Length_M	-0.0799	0.4366	-0.1055	0.3065	Harbison et al. 2013
Day_Bout_Number_F	-0.14	0.1714	0.093	0.3675	Harbison et al. 2013
Day_Bout_Number_M	-0.079	0.4415	0.0089	0.9312	Harbison et al. 2013
Day_Sleep_F	-0.1261	0.2184	0.0602	0.56	Harbison et al. 2013
Day_Sleep_M	-0.059	0.5661	0.1095	0.2884	Harbison et al. 2013
d-Carvone_F	0.1492	0.1252	-0.0479	0.6255	Arya et al. 2015
d-Carvone_M	0.1155	0.2361	0.0204	0.8355	Arya et al. 2015
Ethyl_Acetate_F	0.0596	0.5418	0.1068	0.2759	Arya et al. 2015
Ethyl_Acetate_M	0.1115	0.2528	0.0461	0.6388	Arya et al. 2015
Ethyl_Butyrate_F	0.063	0.5191	-0.2083	0.0321	Arya et al. 2015
Ethyl_Butyrate_M	0.0137	0.8888	-0.2038	0.0361	Arya et al. 2015
Eugenol_F	-0.0937	0.337	-0.2221	0.0221	Arya et al. 2015
Eugenol_M	-0.0622	0.5246	-0.0362	0.7124	Arya et al. 2015
Glucose_Low	-0.0232	0.8332	0.0062	0.9552	Unckless et al. 2015
Glucose_High	-0.0867	0.433	0.0816	0.4634	Unckless et al. 2015
Glucose_Main	-0.077	0.4784	0.0903	0.4082	Unckless et al. 2015
Glycogen_Low	-0.173	0.1134	-0.0869	0.4319	Unckless et al. 2015
Glycogen_High	-0.1249	0.2576	0.1871	0.0903	Unckless et al. 2015
Glycogen_Main	-0.1851	0.0861	0.0159	0.8845	Unckless et al. 2015
Glycerol_Low	0.037	0.7365	-0.2032	0.0638	Unckless et al. 2015
Glycerol_High	0.011	0.9211	0.1405	0.2052	Unckless et al. 2015
Glycerol_Main	0.0223	0.8374	0.0066	0.9517	Unckless et al. 2015
Helional_F	-0.0046	0.9627	0.0079	0.9363	Arya et al. 2015
Helional_M	0.0151	0.8774	0.0692	0.4808	Arya et al. 2015
Hexanal_F	0.0612	0.5313	0.1617	0.0978	Arya et al. 2015
Hexanal_M	0.1011	0.3001	0.1978	0.0421	Arya et al. 2015
l-Carvone_F	0.104	0.2865	0.015	0.8785	Arya et al. 2015
l-Carvone_M	0.1254	0.1979	0.0546	0.5781	Arya et al. 2015
Lifespan_Mean	-0.06	0.5316	-0.0193	0.8417	Ivanov et al. 2015
Lifespan_Median	-0.1255	0.2333	0.0449	0.6729	Ivanov et al. 2015
Load_Low	-0.0435	0.6908	0.1662	0.1283	Unckless et al. 2015
Load_High	0.1277	0.2384	0.0767	0.4827	Unckless et al. 2015
Load_Main	0.0535	0.6228	0.1201	0.2707	Unckless et al. 2015
Mean_Weight_Low	-0.095	0.387	-0.028	0.8007	Unckless et al. 2015
Mean_Weight_High	-0.1658	0.1318	0.1237	0.2653	Unckless et al. 2015
Mean_Weight_Main	-0.1612	0.1358	0.0808	0.4593	Unckless et al. 2015
Methyl_Salicylate_F	0.0552	0.572	0.0156	0.8742	Arya et al. 2015
Methyl_Salicylate_M	0.1426	0.1427	-0.0305	0.7564	Arya et al. 2015
Neggeo_MSB_Sensitivity_F	0.0845	0.387	-0.0363	0.712	Weber et al. 2012
Neggeo_MSB_Sensitivity_M	0.0178	0.8552	-0.1156	0.2379	Weber et al. 2012
Night_Avg_Bout_Length_F	-0.0172	0.867	-0.1558	0.1297	Harbison et al. 2013
Night_Avg_Bout_Length_M	-0.1471	0.1505	-0.1184	0.2507	Harbison et al. 2013
Night_Bout_Number_F	0.0212	0.8364	0.0471	0.6488	Harbison et al. 2013
Night_Bout_Number_M	0.1067	0.2981	0.1494	0.1462	Harbison et al. 2013
Night_Sleep_F	-0.0643	0.5316	-0.0509	0.6225	Harbison et al. 2013
Night_Sleep_M	-0.1555	0.1283	-0.0058	0.9552	Harbison et al. 2013
Protein_Low	0.1039	0.344	-0.0333	0.7639	Unckless et al. 2015
Protein_High	0.0584	0.5977	-0.1441	0.1936	Unckless et al. 2015
Protein_Main	0.0977	0.3681	-0.0663	0.5441	Unckless et al. 2015
Startle_Response_F	-0.0957	0.3156	0.0451	0.6381	Ayroles et al. 2009; Mackay et al. 2012
Startle_Response_M	-0.1126	0.2374	0.0621	0.5174	Ayroles et al. 2009; Mackay et al. 2012
Startle_MSB_Sensitivity_F	0.0728	0.4565	0.0708	0.4711	Weber et al. 2012
Startle_MSB_Sensitivity_M	0.0799	0.4135	0.072	0.4633	Weber et al. 2012
Starvation_Stress_F	-0.1172	0.2207	0.0648	0.499	Ayroles et al. 2009; Mackay et al. 2012
Starvation_Stress_M	-0.0866	0.3659	-0.0268	0.7801	Ayroles et al. 2009; Mackay et al. 2012
Survival_MSB_F	-0.0489	0.6347	0.0283	0.7842	Weber et al. 2012
Survival_MSB_M	-0.0394	0.7018	0.1243	0.2278	Weber et al. 2012
Survival_Paraquat_F	-0.2523	0.0127	0.1218	0.2373	Weber et al. 2012
Survival_Paraquat_M	0.0965	0.36	0.1487	0.1595	Weber et al. 2012
T5_Pigmentation	0.0548	0.5878	-0.1051	0.3004	Dembeck et al. 2015
T6_Pigmentation	0.0296	0.7699	-0.0152	0.8811	Dembeck et al. 2015
T6-T5_Pigmentation	0.0228	0.8218	0.0285	0.7794	Dembeck et al. 2015
Triglycerides_Low	-0.1046	0.3406	-0.1786	0.104	Unckless et al. 2015
Triglycerides_High	-0.0805	0.4666	0.0397	0.7215	Unckless et al. 2015
Triglycerides_Main	-0.1011	0.3513	-0.0549	0.6159	Unckless et al. 2015
Walking_Activity_F	0.013	0.8993	-0.0419	0.6851	Harbison et al. 2013
Walking_Activity_M	0.1806	0.0767	-0.0745	0.4708	Harbison et al. 2013
